# Supplementary material
Source: PubMed Central journal article supplement (PMC4284112)
Supplement: supp_mcu218_aob-14522-s01.pdf [file supp_mcu218_aob-14522-s01.pdf]

## SUPPLEMENTARY DATA

**Fig. S1.** MALDI-TOF MS of *endo*-glucanase-generated XyG fragments from (A) *S. lycopersicum* var. *Saint-Pierre*, (B) *S. lycopersicum* var. *cerasiforme*, (C) *S. pimpinellifolium* and (D) *S. peruvianum* leaves. Possible structures of XyG fragments are shown according to the one-letter nomenclature proposed by Fry *et al.*, (1993) and as described in Fig. 1. The structures in bold were characterized by York *et al.*, (1996), Jia *et al.*, (2005) and Hoffman *et al.*, (2005). Underlined structures indicate the presence of *O*-acetylated side chains on the XyG fragment. The black star represents unassigned fragment and the black square represents the sodiated adduct corresponding to  $(\text{Pent})_6\text{GlcA}_1\text{OAc}_1$  originating from glucuronoarabinoxylan. Pent. Pentose, GlcA. glucuronic acid, OAc. *O*-acetyl group.

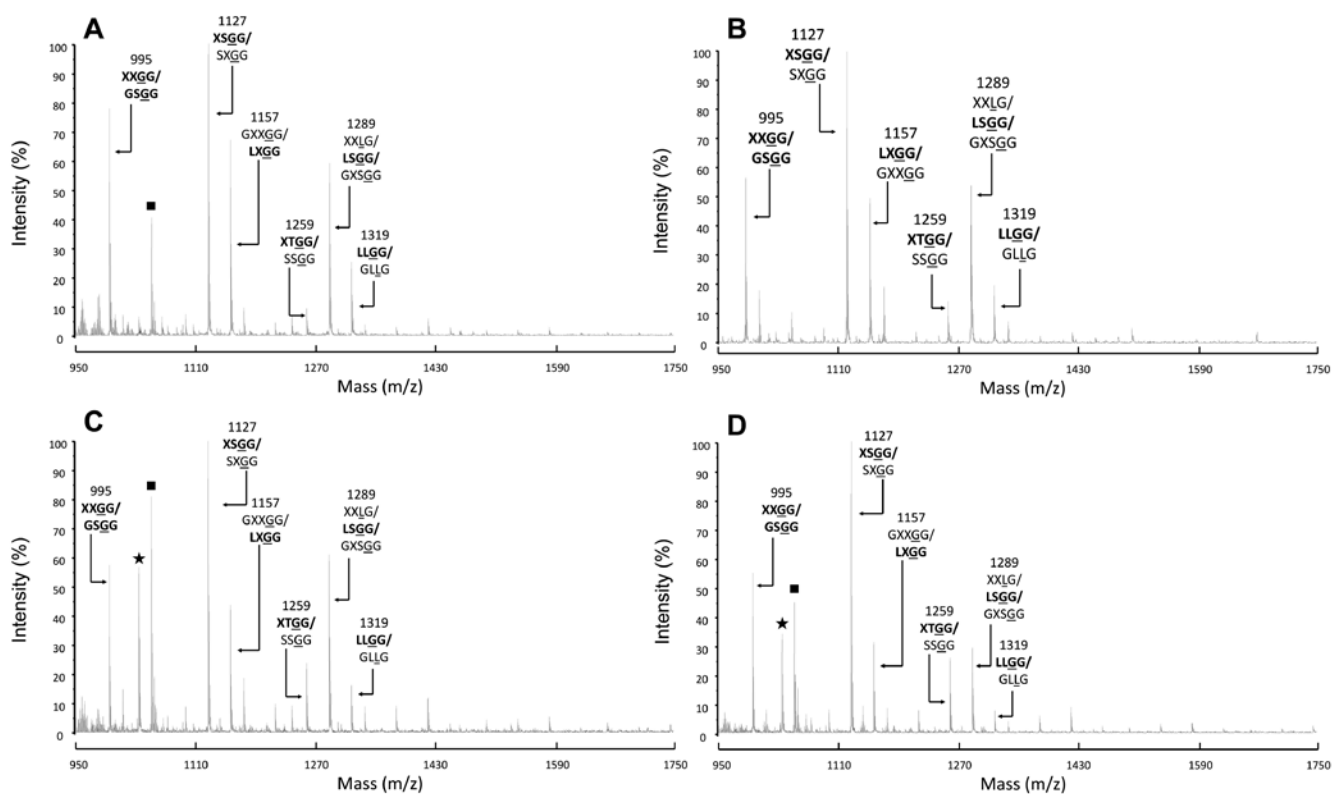

**Fig. S2.** MALDI-TOF MS of *endo*-glucanase-generated XyG fragments from *S. lycopersicum* cv. dombito cell-suspension. Possible structures of XyG fragments are shown according to the one-letter nomenclature proposed by Fry *et al.*, (1993) and shown in Fig. 1. The structures in bold were characterized by York *et al.*, (1996), Jia *et al.*, (2003) and Hoffman *et al.*, (2005). Underlined structures indicate the presence of *O*-acetylated side chains on the XyG fragment.

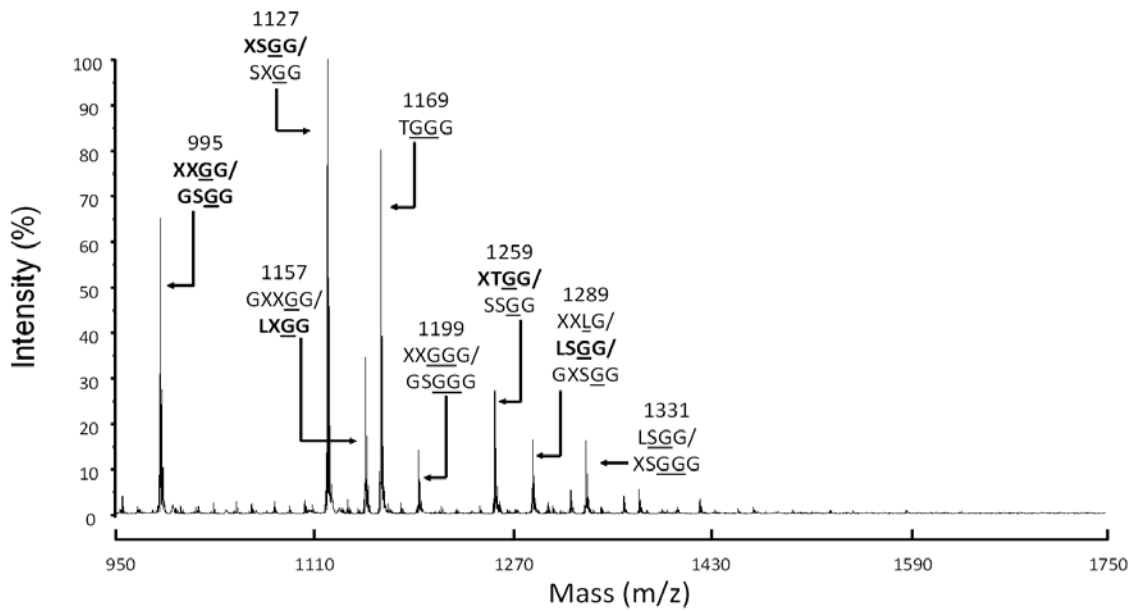

**Fig. S3.** Structural characterization of LSG/XXXG and LSGG/XXLG oligosaccharides from *S. peruvianum* pollen tubes. (A) MALDI-TOF/TOF MS of the precursor ion at  $m/z = 1365.7$  ( $[M+Na]^+$  adduct) of the permethylated Hex<sub>4</sub>Pent<sub>3</sub> structures (LSG and XXXG) and the corresponding fragmentation pattern. (B) MALDI-TOF/TOF MS of the precursor ion at  $m/z = 1569.8$  ( $[M+Na]^+$  adduct) of the permethylated Hex<sub>5</sub>Pent<sub>3</sub> structures (LSGG and XXLG) and the corresponding fragmentation pattern. Ara. arabinose, Fuc. Fucose, Gal. galactose, Glc. glucose, Xyl. xylose. \*, double fragmentation ion. The MALDI-TOF MS of the permethylated oligosaccharides is shown in Fig. 6.

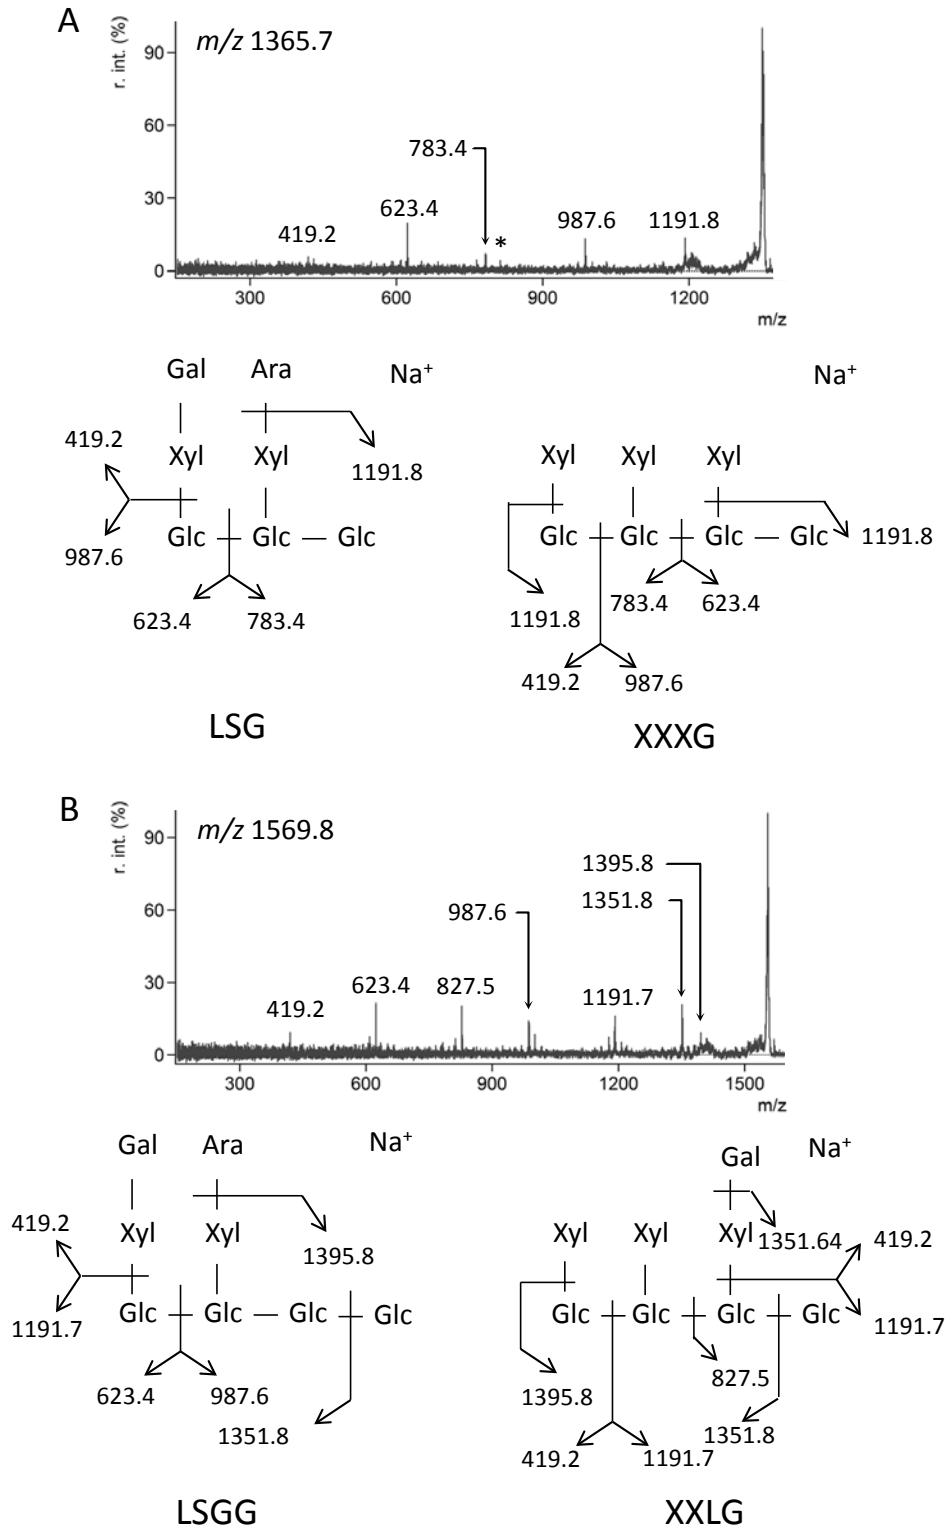

**Fig. S4.** MALDI-TOF MS of *endo*-glucanase-generated XyG fragments from the hemicellulose-enriched extract of *S. lycopersicum* var. *cerasiforme* pollen tubes. Possible structures of XyG fragments are shown according to the one-letter nomenclature proposed by Fry *et al.*, (1993) as described in Fig. 1. Underlined structures indicate *O*-acetylated side chains of XyG fragments. \* indicates the shift of  $m/z = 16$  of the potassium adducts which are present in addition to sodiated adducts.

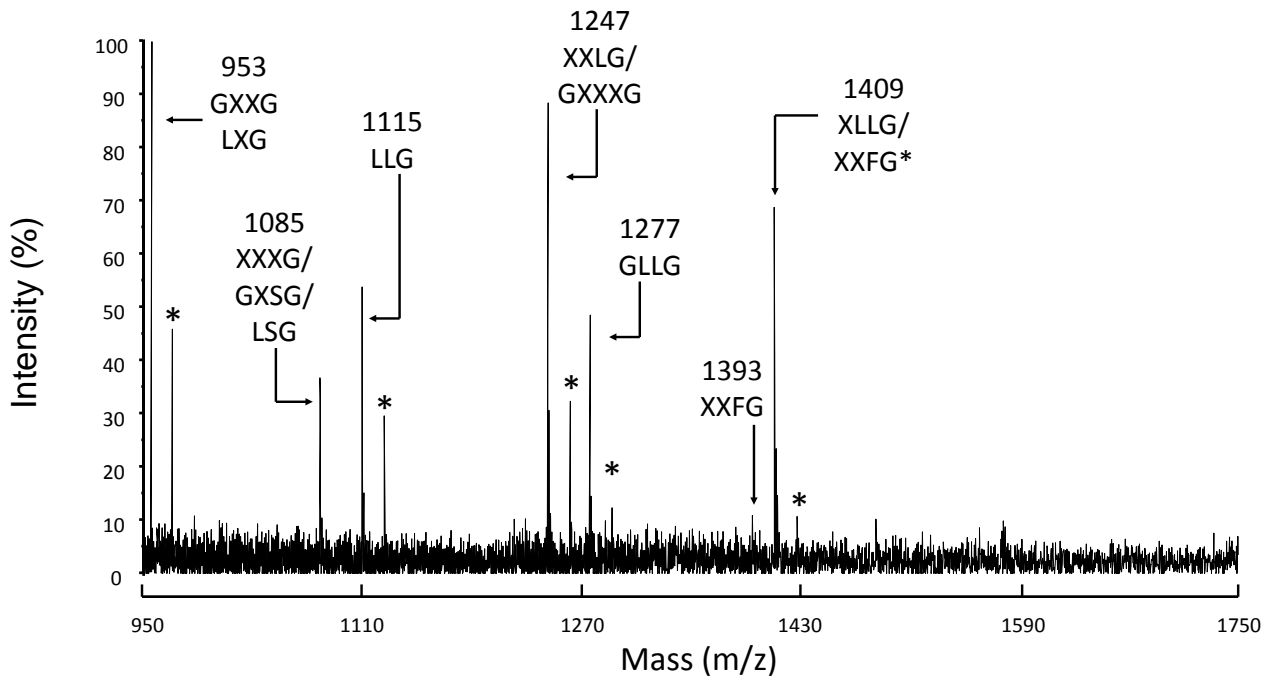

**Fig. S5.** MALDI-TOF MS of *endo*-glucanase-generated XyG fragments from (A) the cell wall extract and (B) the hemicellulose-enriched extract of *N. tabacum* pollen tubes. Possible structures of XyG fragments are shown according to the one-letter nomenclature proposed by Fry *et al.*, (1993) and shown in Fig. 1. The three structures in bold were characterized in *Nicotiana alata* pollen tubes by Lampugnani *et al.*, (2013). Underlined structures represent *O*-acetylated side chains. Black star represents unassigned fragment. \* indicates the shift of  $m/z = 16$  of the potassium adducts.

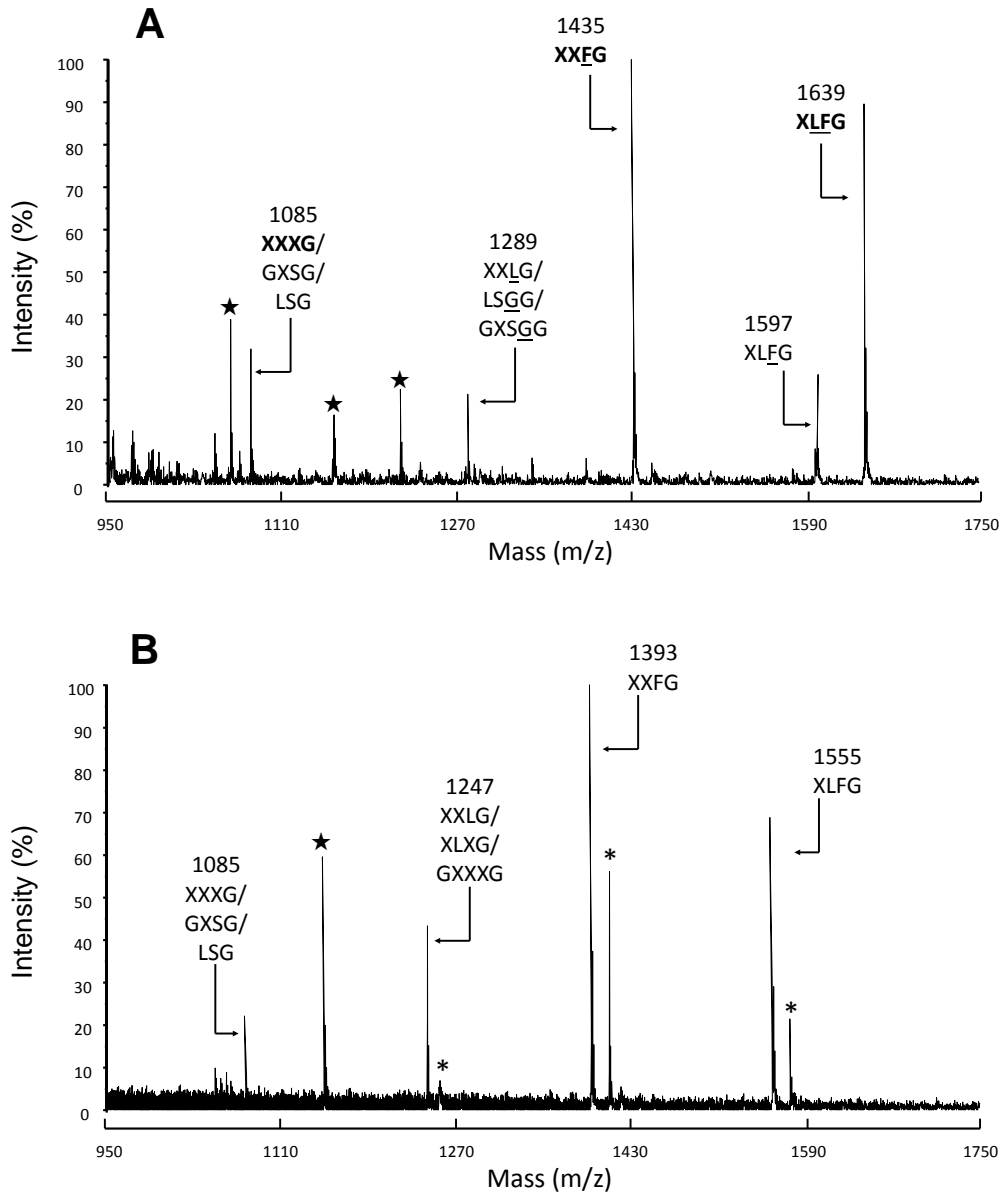

**Table S1.** Relative abundance of XyG oligosaccharides released after *endo*-glucanase digestion of the cell wall of *S. lycopersicum* cv. dombito cell suspension and *S. lycopersicum* var. cerasiforme leaves.

| Mass <sup>a</sup> | Cells                | Leaves                  | Composition <sup>b</sup>                            | Possible structure <sup>c</sup> |
|-------------------|----------------------|-------------------------|-----------------------------------------------------|---------------------------------|
| 953               | 1 ± 0.1 <sup>d</sup> | < 1                     | Hex <sub>4</sub> Pent <sub>2</sub>                  | GXXG                            |
| 995               | 17.5 ± 0.1           | 15.5 ± 2.7 <sup>e</sup> | Hex <sub>4</sub> Pent <sub>2</sub> OAc <sub>1</sub> | <b>XXGG</b> / <b>GSGG</b>       |
| 1055              | < 1                  | 4 ± 0.7                 | Hex <sub>3</sub> Pent <sub>4</sub>                  | SSG                             |
| 1085              | < 1                  | < 1                     | Hex <sub>4</sub> Pent <sub>3</sub>                  | XXXG/GXSG/LSG                   |
| 1127              | 26.1 ± 1.6           | 31 ± 1.5                | Hex <sub>4</sub> Pent <sub>3</sub> OAc <sub>1</sub> | <b>XSGG</b> / <b>SXGG</b>       |
| 1157              | 9.8 ± 0.8            | 14.3 ± 1.8 <sup>e</sup> | Hex <sub>5</sub> Pent <sub>2</sub> OAc <sub>1</sub> | <b>LXGG</b> / <b>GXXGG</b>      |
| 1169              | 21.2 ± 0.4           | - <sup>f</sup>          | Hex <sub>4</sub> Pent <sub>3</sub> OAc <sub>2</sub> | TGGG                            |
| 1199              | 3.8 ± 0.1            | < 1                     | Hex <sub>5</sub> Pent <sub>2</sub> OAc <sub>2</sub> | GSGGG / XXGGG                   |
| 1259              | 7.7 ± 0.5            | 4.6 ± 0.3               | Hex <sub>4</sub> Pent <sub>4</sub> OAc <sub>1</sub> | SSGG/ <b>XTGG</b>               |
| 1289              | 4.5 ± 0.2            | 20.8 ± 3.1              | Hex <sub>5</sub> Pent <sub>3</sub> OAc <sub>1</sub> | XXLG/ <b>LSGG</b> / GXSGG       |
| 1319              | 1.5 ± 0.2            | 6.7 ± 1                 | Hex <sub>6</sub> Pent <sub>2</sub> OAc <sub>1</sub> | <b>LLGG</b> /GLLG               |
| 1331              | 4.5 ± 0.2            | < 1                     | Hex <sub>5</sub> Pent <sub>3</sub> OAc <sub>2</sub> | LSGG/XSGGG                      |
| 1421              | < 1                  | 1.6 ± 0.4               | Hex <sub>5</sub> Pent <sub>4</sub> OAc <sub>1</sub> | <b>LTGG</b> /GSSGG              |
| Fucosylated       | -                    | -                       |                                                     |                                 |

<sup>a</sup>Mass (*m/z*) of the [M+Na]<sup>+</sup> adducts. <sup>b</sup>Hex, hexose; Pent, pentose; OAc, *O*-acetyl substituent. <sup>c</sup>Possible structures of XyG fragments are shown according to the one-letter nomenclature proposed by Fry *et al.*, (1993) and as shown in Fig. 1. The structures in bold were characterized by York *et al.*, (1996), Jia *et al.*, (2003), Jia *et al.*, (2005) and Hoffman *et al.*, (2005). Underlined structures represent *O*-acetylated side chains. <sup>d</sup>Values are expressed as relative percentage and are the means ± SD from MALDI spectra obtained after *endo*-glucanase digestion from three independent cell wall extractions. The five most abundant fragments are highlighted in yellow. <sup>e</sup>Relative abundance of these fragments corresponds to the total of the [M+K]<sup>+</sup> and [M+Na]<sup>+</sup> adducts. <sup>f</sup>not detected above the signal to noise ratio.

**Table S2.** Relative abundance of XyG oligosaccharides released after *endo*-glucanase digestion of the cell wall residue and the hemicellulose-enriched extract from tomato pollen tubes.

| Mass<br>( <i>m/z</i> ) | <i>S. lycopersicum</i>  |                         | <i>S.<br/>pimpinellifolium</i> | <i>S.<br/>peruvianum</i> | Composition | Possible structure                                                   |                       |
|------------------------|-------------------------|-------------------------|--------------------------------|--------------------------|-------------|----------------------------------------------------------------------|-----------------------|
|                        | var. <i>cerasiforme</i> |                         |                                |                          |             |                                                                      | var. <i>St-Pierre</i> |
|                        | Cell Wall               | KOH                     |                                |                          |             |                                                                      | Cell Wall             |
| 953                    | 4.6 ± 0.7               | 29.9 ± 2.8 <sup>f</sup> | 7.1 ± 0.3                      | 15.8 ± 2.6               | 6.2 ± 0.5   | Hex <sub>4</sub> Pent <sub>2</sub>                                   | GXXG                  |
| 995                    | 15.7 ± 1.7              | 1.2 ± 0.5               | 20.8 ± 5.8                     | 15.8 ± 2.2               | 15.7 ± 2.4  | Hex <sub>4</sub> Pent <sub>2</sub> OAc <sub>1</sub>                  | XXGG/GSGG             |
| 1037                   | - <sup>e</sup>          | -                       | 1.1 ± 0.6                      | -                        | -           | Hex <sub>4</sub> Pent <sub>2</sub> OAc <sub>2</sub>                  | S $\underline{G}$ GG  |
| 1055                   | 2.6 ± 0.3               | -                       | 5.0 ± 1.4                      | 2.6 ± 1.6                | -           | Hex <sub>3</sub> Pent <sub>4</sub>                                   | SSG                   |
| 1085                   | 3.1 ± 1.4               | 5.1 ± 0.5               | 4.8 ± 0.1                      | 4.2 ± 0.4                | 13.0 ± 1.5  | Hex <sub>4</sub> Pent <sub>3</sub>                                   | XXXG/LSG/GXSG         |
| 1097                   | 1.8 ± 0.9               | -                       | 3.5 ± 0.3                      | 2.1 ± 1.0                | 2.1 ± 0.6   | Hex <sub>3</sub> Pent <sub>4</sub> OAc <sub>1</sub>                  | S $\underline{S}$ G   |
| 1115                   | 2.2 ± 0.8               | 11.8 ± 0.0 <sup>f</sup> | 1.9 ± 0.4                      | 5.7 ± 0.6                | 2.5 ± 0.2   | Hex <sub>5</sub> Pent <sub>2</sub>                                   | LLG                   |
| 1127                   | 6.1 ± 1.8               | -                       | 3.6 ± 0.1                      | 1.5 ± 0.2                | 2.8 ± 0.2   | Hex <sub>4</sub> Pent <sub>5</sub> OAc <sub>1</sub>                  | XSGG/SXGG             |
| 1157                   | 11.0 ± 1.9              | -                       | 11.1 ± 1.9                     | 8.8 ± 0.5                | 10.0 ± 1.8  | Hex <sub>5</sub> Pent <sub>2</sub> OAc <sub>1</sub>                  | GXXGG/LXGG            |
| 1199                   | 1.9 ± 0.1               | -                       | 1.9 ± 0.4                      | 1.4 ± 0.3                | 1.5 ± 0.9   | Hex <sub>5</sub> Pent <sub>2</sub> OAc <sub>2</sub>                  | GSGGG/XXGGG           |
| 1217                   | 1.1 ± 0.3               | -                       | 1.1 ± 1.3                      | < 1                      | < 1         | Hex <sub>4</sub> Pent <sub>4</sub>                                   | GSSG/GXTG             |
| 1247                   | 2.5 ± 0.6               | 24.2 ± 1 <sup>f</sup>   | 2.8 ± 0.7                      | 3.7 ± 0.5                | 4.4 ± 0.8   | Hex <sub>5</sub> Pent <sub>3</sub>                                   | XXLG/GXXXG            |
| 1259                   | 1.2 ± 0.1               | -                       | 2.0 ± 0.5                      | 1.1 ± 0.5                | < 1         | Hex <sub>4</sub> Pent <sub>4</sub> OAc <sub>1</sub>                  | SSGG/XTGG             |
| 1277                   | < 1                     | 10 ± 0.6 <sup>f</sup>   | < 1                            | 3.4 ± 0.4                | < 1         | Hex <sub>6</sub> Pent <sub>2</sub>                                   | GLLG                  |
| 1289                   | 7.3 ± 1.5               | -                       | 5.4 ± 0.3                      | 3.4 ± 0.4                | 4.4 ± 0.0   | Hex <sub>5</sub> Pent <sub>3</sub> OAc <sub>1</sub>                  | XXLG/LSGG/GXSGG       |
| 1319                   | 11.5 ± 1.8              | -                       | 7.9 ± 1.3                      | 6.8 ± 0.9                | 7.3 ± 2.1   | Hex <sub>6</sub> Pent <sub>2</sub> OAc <sub>1</sub>                  | LLGG/GLLG             |
| 1331                   | 1.0 ± 1.5               | -                       | -                              | -                        | -           | Hex <sub>5</sub> Pent <sub>3</sub> OAc <sub>2</sub>                  | <b>LSGG</b>           |
| 1361                   | 2.1 ± 0.3               | -                       | 1.4 ± 0.2                      | 1.7 ± 0.5                | 1.1 ± 0.3   | Hex <sub>6</sub> Pent <sub>2</sub> OAc <sub>2</sub>                  | XLGGG                 |
| 1379                   | < 1                     | -                       | 1.2 ± 1.3                      | < 1                      | -           | Hex <sub>5</sub> Pent <sub>4</sub>                                   | XL $\underline{S}$ G  |
| 1393                   | < 1                     | 1.8 ± 0.5               | 1.1 ± 0.4                      | 2.9 ± 0.7                | 5.6 ± 1.4   | Hex <sub>5</sub> Pent <sub>3</sub> Dox <sub>1</sub>                  | <b>XXFG</b>           |
| 1409                   | 1.2 ± 0.8               | 15.1 ± 1.6 <sup>f</sup> | < 1                            | 1.2 ± 0.2                | 1.1 ± 0.2   | Hex <sub>6</sub> Pent <sub>3</sub>                                   | XLLG/XXFG*            |
| 1421                   | 1.2 ± 0.4               | -                       | 1.4 ± 0.6                      | < 1                      | < 1         | Hex <sub>5</sub> Pent <sub>4</sub> OAc <sub>1</sub>                  | GSSGG                 |
| 1435                   | 2.9 ± 0.9               | -                       | 2.1 ± 0.6                      | 3.4 ± 0.9                | 6.8 ± 2.0   | Hex <sub>5</sub> Pent <sub>3</sub> Dox <sub>1</sub> OAc <sub>1</sub> | XXFG                  |
| 1451                   | 1.0 ± 0.3               | -                       | 1.2 ± 0.3                      | 1.3 ± 0.5                | 1.2 ± 0.2   | Hex <sub>6</sub> Pent <sub>3</sub> OAc <sub>1</sub>                  | XXLGG                 |
| 1463                   | -                       | -                       | 1.0 ± 0.2                      | < 1                      | 1.2 ± 0.2   | Hex <sub>5</sub> Pent <sub>4</sub> OAc <sub>2</sub>                  | XXSGG                 |
| 1481                   | 6.4 ± 2.3               | -                       | 3.7 ± 0.6                      | 2.1 ± 0.8                | 3.0 ± 1.3   | Hex <sub>6</sub> Pent <sub>2</sub> OAc <sub>1</sub>                  | GLLG                  |
| 1493                   | 2.0 ± 0.5               | -                       | 1.1 ± 0.2                      | < 1                      | < 1         | Hex <sub>6</sub> Pent <sub>3</sub> OAc <sub>2</sub>                  | GXSGGG                |
| 1555                   | -                       | -                       | < 1                            | 2.0 ± 0.6                | 2.1 ± 0.7   | Hex <sub>6</sub> Pent <sub>3</sub> Dox <sub>1</sub>                  | <b>XLFG</b>           |
| 1597                   | 1.3 ± 0.1               | -                       | 1.0 ± 0.6                      | 2.8 ± 0.9                | 2.8 ± 1.0   | Hex <sub>6</sub> Pent <sub>3</sub> Dox <sub>1</sub> OAc <sub>1</sub> | XLFG/XLFG             |
| 1639                   | 2.3 ± 0.7               | -                       | 1.1 ± 0.4                      | 1.8 ± 0.4                | 2.1 ± 0.7   | Hex <sub>6</sub> Pent <sub>3</sub> Dox <sub>1</sub> OAc <sub>2</sub> | <b>XLFG</b>           |
| Fucosylated            | 6.5 ± 1.4               | -                       | 5.3 ± 1.0                      | 12.9 ± 1.7               | 19.4 ± 2.6  |                                                                      |                       |
| <i>O</i> -acetylated   | 73.9 ± 6.2              | -                       | 91.1 ± 8.4                     | 55.3 ± 6.1               | 63.5 ± 8.3  |                                                                      |                       |

<sup>a</sup>Mass of the [M+Na]<sup>+</sup> adducts. <sup>b</sup>Hex, hexose; Pent, pentose; Dox, deoxyhexose; OAc, *O*-acetyl substituent. <sup>c</sup>Possible structures of XyG fragments are shown according to the one-letter nomenclature proposed by Fry *et al.*, (1993) and described in Fig. 1. Underlined structures represent *O*-acetylated side chains.

<sup>d</sup>Values are expressed as relative percentage and are the means ± SD from MALDI-TOF mass spectra obtained after *endo*-glucanase digestion from three independent pollen tube cell wall extractions. The five most abundant fragments are highlighted in yellow. <sup>e</sup>not detected above the signal to noise ratio. <sup>f</sup>Relative abundance of these fragments corresponds to the total of the [M+K]<sup>+</sup> and [M+Na]<sup>+</sup> adducts. \* adduct [M+K]<sup>+</sup>. Structures in bold were characterized in *S. peruvianum* pollen tubes.

**Table S3.** Relative abundance of XyG oligosaccharides released after *endo*-glucanase digestion of the cell wall residue and the hemicellulose-enriched extract from *N. tabacum* pollen tubes.

| Mass <sup>a</sup>    | Cell wall              | KOH                     | Composition <sup>b</sup>                                             | Possible structure <sup>c</sup> |
|----------------------|------------------------|-------------------------|----------------------------------------------------------------------|---------------------------------|
| 953                  | 4.9 ± 1.6 <sup>d</sup> | 1.0 ± 0.8               | Hex <sub>4</sub> Pent <sub>2</sub>                                   | GXXG                            |
| 995                  | 3.6 ± 3.4              | - <sup>e</sup>          | Hex <sub>4</sub> Pent <sub>2</sub> OAc <sub>1</sub>                  | XXGG/GSGG                       |
| 1085                 | 11.7 ± 2.7             | 5.2 ± 1.2               | Hex <sub>4</sub> Pent <sub>3</sub>                                   | <b>XXXG</b>                     |
| 1157                 | 3.1 ± 0.4              | -                       | Hex <sub>5</sub> Pent <sub>2</sub> OAc <sub>1</sub>                  | LXGG                            |
| 1247                 | 4.5 ± 2                | 16.8 ± 2.7 <sup>f</sup> | Hex <sub>5</sub> Pent <sub>3</sub>                                   | XXLG/XLXG                       |
| 1289                 | 8.8 ± 1                | -                       | Hex <sub>5</sub> Pent <sub>3</sub> OAc <sub>1</sub>                  | XXLG/XLXG                       |
| 1393                 | 3.0 ± 0.6              | 50.4 ± 1.4 <sup>f</sup> | Hex <sub>5</sub> Pent <sub>3</sub> Dox <sub>1</sub>                  | XXFG                            |
| 1435                 | 29.7 ± 1.9             | -                       | Hex <sub>5</sub> Pent <sub>3</sub> Dox <sub>1</sub> OAc <sub>1</sub> | <b>XXFG</b>                     |
| 1555                 | < 1                    | 26.6 ± 3.3 <sup>f</sup> | Hex <sub>6</sub> Pent <sub>3</sub> Dox <sub>1</sub>                  | XLFG                            |
| 1597                 | 6.2 ± 1.6              | -                       | Hex <sub>6</sub> Pent <sub>3</sub> Dox <sub>1</sub> OAc <sub>1</sub> | XLFG/XLFG                       |
| 1639                 | 23.0 ± 3.5             | -                       | Hex <sub>6</sub> Pent <sub>3</sub> Dox <sub>1</sub> OAc <sub>2</sub> | <b>XLFG</b>                     |
| Fucosylated          | 61.9 ± 4.4             | 77 ± 4.7                |                                                                      |                                 |
| <i>O</i> -acetylated | 71.9 ± 7.2             | -                       |                                                                      |                                 |

<sup>a</sup>Mass (*m/z*) of the [M+Na]<sup>+</sup> adducts. <sup>b</sup>Hex, hexose; Pent, pentose; Dox, deoxyhexose; OAc, *O*-acetyl substituent. <sup>c</sup>Possible structures of XyG fragments are shown according to the one-letter nomenclature proposed by Fry *et al.*, (1993) and as described in Fig. 1. Underlined structures represent *O*-acetylated side chains. <sup>d</sup>Values are expressed as relative percentage and are the means ± SD from MALDI-TOF mass spectra obtained after *endo*-glucanase digestion from three independent pollen tube cell wall extractions. The five most abundant fragments are highlighted in yellow. <sup>e</sup>not detected above the signal to noise ratio. <sup>f</sup>Relative abundance of these fragments corresponds to the total of the [M+K]<sup>+</sup> and [M+Na]<sup>+</sup> adducts. Structures in bold were characterized in *Nicotiana alata* pollen tubes by Lampugnani *et al.*, (2013).



**Table S4.** Monosaccharide composition and glycosyl-linkage analysis of *N. tabacum* hemicellulose-enriched pollen tube extract.

| Monosaccharide composition <sup>a</sup> |      |
|-----------------------------------------|------|
| (mol%)                                  |      |
| Glc                                     | 27.9 |
| Xyl                                     | 11.1 |
| Gal                                     | 25   |
| Ara                                     | 21.2 |
| Fuc                                     | 1.4  |
| GalA                                    | 4.3  |
| Rha                                     | 2.4  |
| Man                                     | 6.8  |
| Detected glycosyl-linkage <sup>b</sup>  |      |
| 3-Glcp (callose)                        |      |
| <b>4-Glcp</b> (XyG)                     |      |
| <b>4,6-Glcp</b> (XyG)                   |      |
| <b>t-Xylp</b> (XyG)                     |      |
| <b>2-Xylp</b> (XyG)                     |      |
| <b>t-Galp</b> (XyG, RG-I, AGP)          |      |
| <b>2-Galp</b> (XyG)                     |      |
| 4-Galp (RG-I)                           |      |
| 6-Galp (RG-I, AGP)                      |      |
| t-Araf (RG-I, AGP)                      |      |
| 5-Araf (RG-I)                           |      |
| <b>t-Fucp</b> (XyG)                     |      |

<sup>a</sup>Determined by GC and expressed as mol%. Ara, arabinose; Fuc, fucose; Gal, galactose; Glc, glucose; GalA, galacturonic acid; Rha, rhamnose; Man, mannose; Xyl, xylose. <sup>b</sup>Determined by GC-MS of partially methylated alditol acetates. t-Araf denotes 1,4-di-*O*-acetyl-1-deuterio-2,3,5-tri-*O*-methyl-D-arabinitol, etc... Polymers that contain these glycosyl-linkages are indicated in brackets. XyG, Xyloglucan, RG-I, rhamnogalacturonan-I, AGP, arabinogalactan proteins. In bold are the glycosyl-linkages found in XyG. nd. not detected.
